# Supplementary material for: Synthesis, crystal structure and optical properties of a new fluorocarbonate with an interesting sandwich-like structure
Source: Royal Society of Chemistry journal article supplement (doi:10.1039/c8dt00760h), 2018-01-01
Supplement: c8dt00760h1.pdf [file c8dt00760h1.pdf]

## Supporting Information

### Synthesis, Crystal Structure and Optical Properties of a New Fluorocarbonate with Interesting Sandwich-like Structure

Changcheng Tang, Xingxing Jiang, Shu Guo, Mingjun Xia, Lijuan Liu,\* Xiaoyang Wang, Zheshuai Lin  
and Chuangtian Chen

#### Crystallographic information

The Crystallographic data for  $\text{Na}_3\text{Zn}_2(\text{CO}_3)_3\text{F}$  has been deposited with CCDC  
numbers of 1419125.

**Table S1.** Crystal data and structure refinement for  $\text{Na}_3\text{Zn}_2(\text{CO}_3)_3\text{F}$ 

| $\text{Na}_3\text{Zn}_2(\text{CO}_3)_3\text{F}$ |              |
|-------------------------------------------------|--------------|
| Fw                                              | 398.74       |
| $a(\text{\AA})$                                 | 14.6090(15)  |
| $b(\text{\AA})$                                 | 8.5274(7)    |
| $c(\text{\AA})$                                 | 20.1877(13)  |
| $\beta$                                         | 102.426(7)   |
| Space group                                     | $C2/c$       |
| $V(\text{\AA}^3)$                               | 2456.0(4)    |
| $Z$                                             | 12           |
| $T(\text{K})$                                   | 103.5        |
| $\lambda(\text{\AA})$                           | 0.71073      |
| $\rho_c(\text{g/cm}^3)$                         | 3.236        |
| $\mu(\text{cm}^{-1})$                           | 6.081        |
| $R(F)^a$                                        | 0.0438(1982) |
| $R_w(F_o^2)^b$                                  | 0.1150(2421) |

**Table S2.** Selected bond lengths (Å) for Na<sub>3</sub>Zn<sub>2</sub>(CO<sub>3</sub>)<sub>3</sub>F

---

|         |          |         |          |        |            |
|---------|----------|---------|----------|--------|------------|
| Zn1–O9  | 1.984(4) | Zn3–O10 | 2.092(3) | O7–C3  | 1.280(5)   |
| Zn1–O4  | 2.015(3) | Na1–F1  | 2.397(2) | O9–C3  | 1.281(5)   |
| Zn1–O1  | 2.016(3) | Na1–F2  | 2.398(3) | C4–O11 | 1.248(5)   |
| Zn2–O6  | 2.028(3) | Na2–F2  | 2.357(3) | C4–O10 | 1.307(5)   |
| Zn1–O15 | 2.114(6) | Na2–F2  | 2.357(3) | C4–O12 | 1.307(5)   |
| Zn1–O14 | 2.125(6) | C1–O1   | 1.280(5) | C5–O14 | 1.236(6)   |
| Zn2–O8  | 1.996(3) | C1–O2   | 1.282(5) | C5–O13 | 1.295(6)   |
| Zn2–O3  | 2.019(3) | C1–O3   | 1.281(5) | C5–O15 | 1.342(6)   |
| Zn2–O12 | 2.089(3) | C2–O5   | 1.276(5) | Zn1–F2 | 2.041(2)   |
| Zn3–O7  | 1.992(3) | C2–O6   | 1.282(5) | Zn2–F2 | 2.045(2)   |
| Zn3–O2  | 2.022(3) | C2–O4   | 1.293(5) | Zn3–F1 | 2.0440(11) |
| Zn3–O5  | 2.022(3) | C3–O8   | 1.286(5) |        |            |

---

**Table S3.** Positional coordinates and equivalent isotropic displacement parameters for Na<sub>3</sub>Zn<sub>2</sub>(CO<sub>3</sub>)<sub>3</sub>F.

| Atom | Wyck. | Site | S.O.F. | x/a          | y/b         | z/c         | U <sub>eq</sub> [Å <sup>2</sup> ] |
|------|-------|------|--------|--------------|-------------|-------------|-----------------------------------|
| Zn1  | 8f    | 1    | 1      | 0.19292(4)   | 0.27228(7)  | 0.34666(2)  | 0.00792(19)                       |
| Zn2  | 8f    | 1    | 1      | 0.13619(3)   | 0.27578(6)  | 0.14991(2)  | 0.00641(18)                       |
| Zn3  | 8f    | 1    | 1      | 0.02503(3)   | -0.23285(6) | 0.34978(2)  | 0.00618(18)                       |
| Na1  | 8f    | 1    | 1      | 0.14639(12)  | -0.0414(2)  | 0.24981(8)  | 0.0107(4)                         |
| Na2  | 4e    | 2    | 1      | 0            | 0.4090(3)   | 1/4         | 0.0103(5)                         |
| Na3  | 8f    | 1    | 1      | 0.23474(11)  | -0.0571(2)  | 0.43302(8)  | 0.0096(4)                         |
| Na4  | 8f    | 1    | 1      | 0.05478(13)  | 0.4409(2)   | 0.44546(10) | 0.0191(5)                         |
| Na5  | 8f    | 1    | 1      | 0.38170(12)  | 0.4047(2)   | 0.42984(9)  | 0.0117(4)                         |
| F1   | 4e    | 2    | 1      | 0            | -0.1682(4)  | 1/4         | 0.0111(8)                         |
| F2   | 8f    | 1    | 1      | 0.12599(17)  | 0.2377(3)   | 0.24805(11) | 0.0102(6)                         |
| C1   | 8f    | 1    | 1      | 0.0338(3)    | 0.1027(5)   | 0.3640(2)   | 0.0074(9)                         |
| C2   | 8f    | 1    | 1      | 0.3529(3)    | 0.1019(5)   | 0.3261(2)   | 0.0067(9)                         |
| C3   | 8f    | 1    | 1      | 0.3062(3)    | 0.1066(5)   | 0.1533(2)   | 0.0091(10)                        |
| C4   | 8f    | 1    | 1      | 0.0887(3)    | 0.7585(5)   | 0.49889(19) | 0.0096(11)                        |
| C5   | 4d    | -1   | 1      | 1/4          | 1/4         | 1/2         | 0.0114(15)                        |
| O1   | 8f    | 1    | 1      | 0.1195(2)    | 0.0800(3)   | 0.36144(14) | 0.0089(6)                         |
| O2   | 8f    | 1    | 1      | -0.02241(19) | -0.0139(3)  | 0.36109(14) | 0.0075(6)                         |
| O3   | 8f    | 1    | 1      | 0.0038(2)    | 0.2423(4)   | 0.36927(16) | 0.0123(7)                         |
| O4   | 8f    | 1    | 1      | 0.3210(2)    | 0.2432(3)   | 0.32628(16) | 0.0106(7)                         |
| O5   | 8f    | 1    | 1      | 0.4392(2)    | 0.0803(4)   | 0.32556(15) | 0.0091(6)                         |
| O6   | 8f    | 1    | 1      | 0.29826(19)  | -0.0155(3)  | 0.32687(14) | 0.0070(6)                         |
| O7   | 8f    | 1    | 1      | 0.3381(2)    | 0.2437(4)   | 0.14555(16) | 0.0098(7)                         |
| O8   | 8f    | 1    | 1      | 0.21966(19)  | 0.0886(4)   | 0.15592(14) | 0.0065(6)                         |
| O9   | 8f    | 1    | 1      | 0.3603(2)    | -0.0130(4)  | 0.1576(2)   | 0.0251(9)                         |
| O10  | 8f    | 1    | 1      | 0.0209(2)    | 0.7103(4)   | 0.44987(14) | 0.0112(7)                         |
| O11  | 8f    | 1    | 1      | 0.1258(2)    | 0.8903(4)   | 0.49899(14) | 0.0136(7)                         |

|     |    |   |     |           |           |             |            |
|-----|----|---|-----|-----------|-----------|-------------|------------|
| O12 | 8f | 1 | 1   | 0.1143(2) | 0.6575(4) | 0.54814(14) | 0.0111(7)  |
| O13 | 8f | 1 | 0.5 | 0.1813(4) | 0.3367(7) | 0.5097(3)   | 0.0096(13) |
| O14 | 8f | 1 | 0.5 | 0.2746(4) | 0.2314(7) | 0.4457(3)   | 0.0078(13) |
| O15 | 8f | 1 | 0.5 | 0.2847(4) | 0.1522(7) | 0.5514(3)   | 0.0125(14) |

---
